1  
2  
3  
4  
5  
6  
7  
8  
9  
10  
11  
12  
13  
14  
15  
16  
17  
18  
19  
20  
21  
22  
23  
24  
25  
26

**Epidermal Growth Factor (EGF) single mutants highlighted by a homologs cross-  
conservation approach differentially affect the EGF Receptor (EGFR) downstream  
pathway**

*or*

**Differential effect of EGF mutants on EGFR pathway**

**Merzhakupova, D. <sup>#</sup> ; Pascarelli, S. <sup>#</sup> ; Laurino P.\***

Okinawa Institute of Science and Technology Graduate University, 1919-1 Tancha, Onna-son,  
Okinawa 904-0412 Japan.

\* Corresponding author (paola.laurino@oist.jp).

<sup>#</sup> D.M. and S.P. equally contributed to this work.

27 **Abstract**

28 Molecular co-evolution is a key feature of biological systems. Molecular interactions (ligand-  
29 receptor, protein-protein, etc.) usually evolve simultaneously and independently to optimize  
30 binding. Frequently, these interactions involve one receptor that binds multiple ligands. Each  
31 ligand often leads to a different pathway activation intra-cellularly. Understanding single  
32 amino acid roles in evolving ligands and their contributions to downstream pathways of the  
33 receptor is still challenging.

34 We developed a cross-conservation approach to identify functionally important EGF  
35 residues. Four EGF mutants (N32R, D46R, K48T, W50Y) have been selected and studied  
36 biochemically and at the cellular level. While these mutants retain binding affinities for  
37 EGFR similar to that of EGF, surprisingly the effects of two of them (D46R, K48T) at the  
38 cellular level changed, inducing higher proliferation levels in normal fibroblasts and reducing  
39 proliferation in skin cancer cells. These results lay the base to understand the basis of EGF  
40 signaling.

41

42 **Introduction**

43 Protein-protein interactions (PPIs) regulate many biological processes (1). PPIs are one of the  
44 most interesting and well-studied examples of molecular co-evolution in biological systems.

45 These interactions are sometimes defined by one part (receptor) that binds several  
46 counterparts (ligands). Receptors and ligands experience different selective constraints, and  
47 receptors tend to evolve more slowly due to the necessity of binding multiple ligands.

48 Identification of key residues in a ligand that may affect binding and the resulting cellular  
49 phenotype should provide new understanding of PPI co-evolution (2).

50 In recent years, different experimental techniques have been developed to define the effects  
51 of single mutant proteins at the cellular level (3). Often these approaches generate false-

52 positive and false-negative that can be misinterpreted and leading to unclear conclusions (3).  
53 Bioinformatic tools can be exploited for a more detailed analysis of PPIs co-evolution. The  
54 combination of sequence and structural alignment methods have made possible to identify  
55 essential amino acids for understanding ligand-receptor interactions but still the ligand effect  
56 at the cellular level remain unclear (4).

57 The epidermal growth factor (EGF)-like domain ligand – ErbB1(EGFR) receptor signaling  
58 system is involved in many biological events in multicellular organisms (5) and is considered  
59 to be ancient (6). Few studies have shown that overexpression of oncogenic receptors and  
60 ligands may induce different types of cancers (7). EGF ligands are also involved in ion  
61 transport, glycolysis, and synthesis of proteins and nucleic acids (8). They also induce  
62 stimulation of fibroblasts in early phases of wound healing (9). As anti-EGFR antibodies  
63 often lead to inconsistent outcomes, design of EGF analogues remained an attractive target  
64 for biomedical applications (10).

65

66 Comprehensive analysis of specific residues in EGF ligands from different species and  
67 among different EGFR ligands (EGF, HBEGF, EPGN, BTC, EREG, AREG, TGFA) might  
68 allow the design of mutants with different or improved functions. Recent studies have been  
69 shown that some EGF residues like R41 and L47 are highly conserved and important for high  
70 binding affinity to EGFR in the A431 cancer cell line (11). Another study highlighted Y13,  
71 L15 and H16 residues as essential for downstream activity of ErbB1 (12). These outcomes  
72 were based on structural analyses of ligands and experimental validation.

73 In this paper we show a novel approach to study PPIs through cross-conservation analysis.

74 We combined bioinformatics and experimental tools to study co-evolution of the EGF-EGFR  
75 ligand-receptor system (Figure 1A). This method allows us to analyze and characterize  
76 evolutionarily conserved EGF residues and to determine which residues are conserved among

77 different ligands. Furthermore, the identified residues have phenotypic implications at the  
78 cellular level, influencing protein activation in the EGFR downstream pathway. Overall, this  
79 approach has been critical to identify residues that play important role in cellular proliferation  
80 and cancer cells.

81

## 82 **Results**

83 Initially, we identified amino acid residues in EGF that are essential for protein-coevolution  
84 and mitogenic activity of the ligand using what we named cross-conservation approach.

85 Cross-conservation analysis highlights functional positions in proteins, based upon previous  
86 knowledge of their interacting partners. The combination of two residue conservation  
87 measures generated a cross-conservation plot (Figure 1B), as combination of the alignment of  
88 all the ligands (paralogs that still share binding to same receptor), using either the Multiple  
89 Sequence Alignment (MSA, Figure A in S1 Figure) or the Multiple SStructural Alignment  
90 (MSTA, Figure B in S1 Figure), and from the alignment of orthologs sequences of EGFs  
91 (herein so called evolutionary alignment, Figure C in S1 Figure).

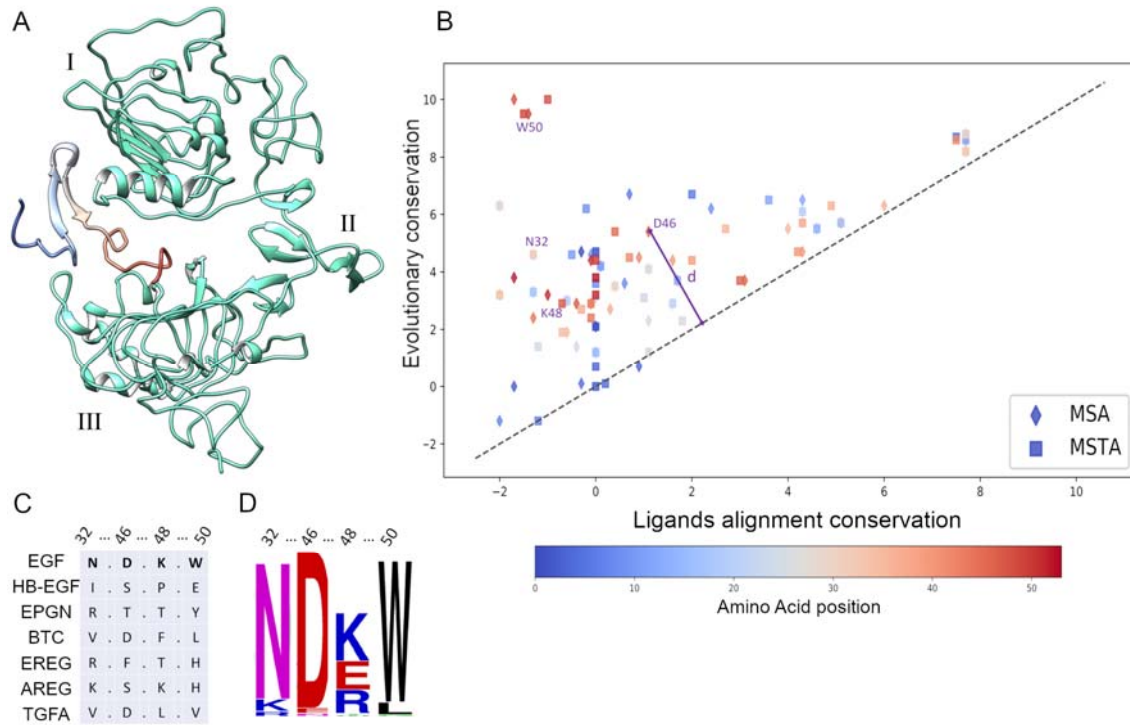

92

93 **Figure 1. Cross-conservation analysis.**

94 (A) Structure of extracellular EGFR-EGF complex (from PDB: 1ivo). EGFR extracellular  
 95 domain in cyan cartoon. EGF peptide is represented as cartoon in a gradient of blue to red  
 96 from the N-term to the C-term. I, II and III indicate the three ECD domains. C-tail of EGF is  
 97 disordered and in close proximity of domain III of EGFR. (B) Cross-conservation plot. The  
 98 plot is obtained by crossing the conservation measures of ligand alignments (rhombus for  
 99 MSA conservation, squares for MSTA conservation) and evolutionary alignments (S1  
 100 Figure). Positions highlighted in purple have been chosen for experimental verification. The  
 101 color gradient shows the N-/C-end displacement of the amino acid consistently with panel A.  
 102 Distance from the diagonal (e.g., 'd' in the plot) is used to calculate the cross-conservation  
 103 score. Interestingly, no point lies in the bottom right half of the plot suggesting that ligand  
 104 and evolutionary conservation are not independent and differently influenced by evolution  
 105 pressure. The C-terminus amino acids have higher cross-conservation score on average,  
 106 highlighting that this part has a functional role. (C) Extract of the paralog ligands alignments

107 focusing on the chosen positions, showing a low degree of conservation. (D) Extract of the  
108 logo generated from the orthologs evolutionary alignment (Figure C in S1 Figure). Positions  
109 chosen for mutation are highly conserved, therefore resulting in a high cross-conservation  
110 score.

111

112 The cross-conservation score is calculated as the distance (d, Figure 1B) from the diagonal.

113 The list of residues sorted by score is shown in S1 Table. According to our analysis, residues

114 with high scores are concentrated on the C-terminal tail. Along with the cross-conservation

115 score, the choice of positions for mutation was influenced by three factors: first of all, the

116 distance from the receptor. Secondly, we considered the amino acid variation among ligand

117 types. Each ligand has different binding affinity and activate different pathways; therefore,

118 we designed mutations with the aim of changing pathway activation taking into consideration

119 the residues types in the ligands that show a different cellular effect. Finally, some of the

120 residues that show high cross-conservation score have intramolecular interaction with other

121 amino acid and, if mutated, they will not only change interaction with the receptor but also

122 lose EGF structural stability (namely “residue swapping” behavior showed in S2 Figure). A

123 phylogeny of all EGFR ligands was also built (S3 Figure), presenting a high degree of

124 monophyly among the seven paralogs. This monophyly justify the comparison of different

125 ligands in our cross-conservation study.

126 Based on these factors together with cross-conservation analysis, we designed EGF mutants

127 with single amino-acid substitutions (N32R, D46T, K48T and W50Y). All these positions

128 have higher than median cross conservation scores. Furthermore position 46, 48 and 50 were

129 chosen because according to our study the EGF C-terminus tail seems to play a critical role in

130 the ligand function. The amino acid mutation was selected according to its abundance in

131 other ligands having different function as explained above. N32R was also chosen since it is

132 highly conserved in other ligands in the corresponding evolutionary alignment (e.g. CVC in  
133 TGFA, or CRC in EREG).  
134 We characterized all of them biochemically and at the cellular level. Using circular dichroism  
135 (CD) experiments, we confirmed that the secondary structure of these mutants was  
136 maintained (S4 Figure). Then the  $K_d$  for EGFR was determined *in vitro* by Isothermal  
137 Titration Calorimetry (ITC). ITC measurements of the binding of all mutants to the ECD of  
138 EGFR exhibited similar  $K_d$  values to the WT EGF. Only N32R has 2-fold higher affinity for  
139 EGFR compared to WT EGF (Figure 2B).

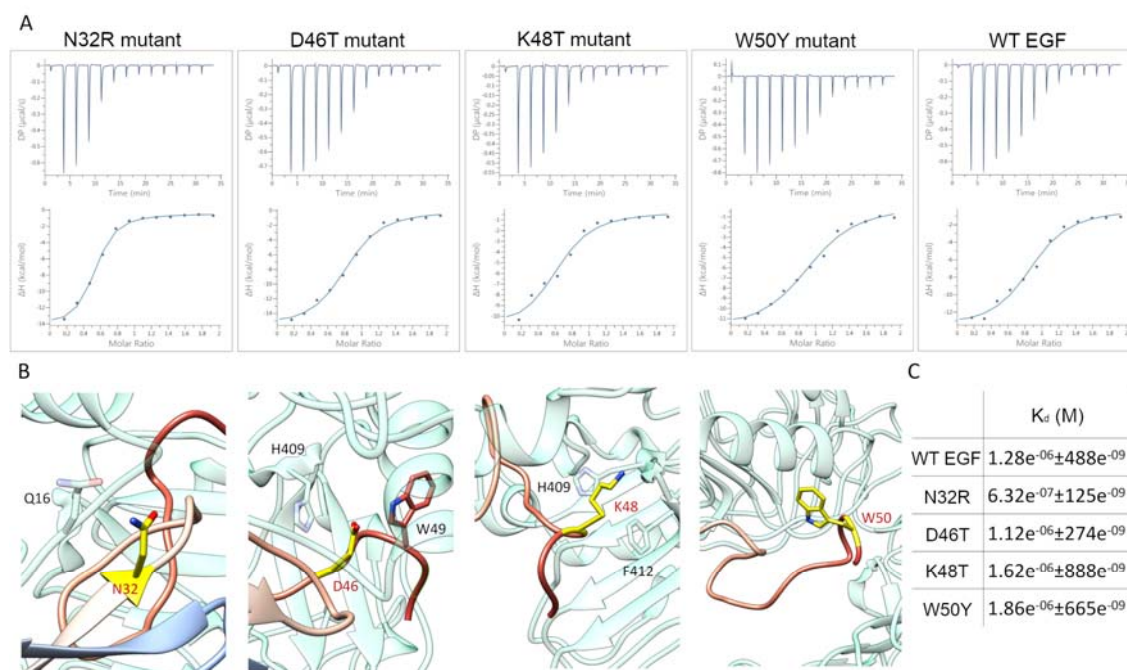

140  
141 **Figure 2. ITC measurements of EGF mutants and the EGFR receptor.**  
142 (A) ITC analysis of WT EGF ligand and mutants N32R, D46T, and K48T binding to the  
143 ECD of the EGFR receptor at 25°C. Measurements were taken by adding WT EGF at 200  
144 μM to the ECD of EGFR at 20 μM. (B) Four zoom-in of X-Ray structure of the extracellular  
145 domain (ECD) of EGFR bound to EGF (PDB 1IVO). In cyan cartoon the ECD of EGFR.  
146 Each zoom-in focuses on the mutated residue. Highlighted in yellow stick side chain of the

147 mutated residues and in cyan stick side chain of the residue of ECD in proximity ( $< 5 \text{ \AA}$  with  
148 the mutated residue. (C)  $K_d$  calculated from the ITC measurements using the program  
149 Affinimeter KinITC Kintecs Software.

150

151 Mutation N32R is on the interface between ligand and receptor (S5 Figure). The slightly  
152 higher affinity is probably due to the presence of the guanidinium group of R which is  
153 positive charged and could interact with Q16 of EGFR ECD.

154

155 Surprisingly although the biochemical parameters are not substantially different, EGF  
156 variants affected cell growth in cell proliferation studies. Human and mouse normal  
157 fibroblasts, bj5- $\alpha$  and Albino swiss 3T3, respectively, and epidermoid carcinoma A431 cell  
158 lines, were cultured varying concentrations (1 nM, 10 nM and 100 nM) of wild-type EGF and  
159 EGF mutants for three days. EGF mutants D46T and K48T induced cell proliferation in bj5-  
160  $\alpha$  (Figure 3A) more effectively than WT EGF, while no significant effect was detected on an  
161 Albino Swiss mouse 3T3 cell line (S6 Figure).

162 We further tested these two mutants and importantly, we found both D46T and K48T  
163 increased cell death in the A431 skin cancer cell line, upon 100 nM EGF mutants treatment  
164 (Figure 3B). In contrast, 1 nM and 10 nM for both mutants only slightly reduced the number  
165 of cancer cells (S7 Figure).



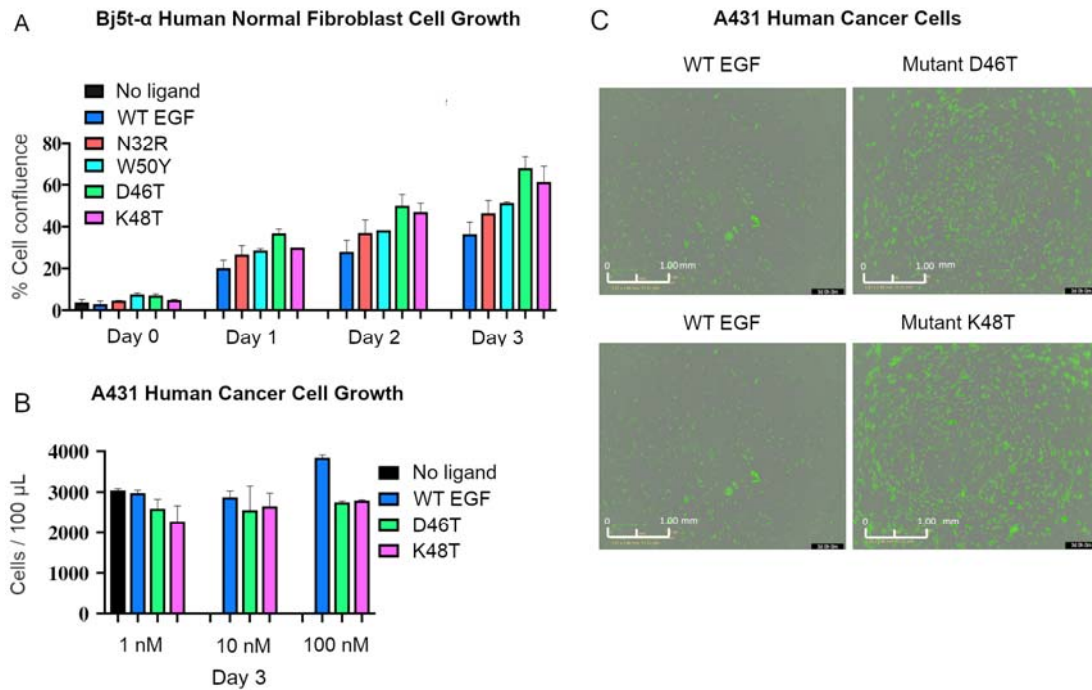

166

167 **Figure 3. Results of cell growth assays for cells treated with EGF variants.**

168 (A) Effect of different concentrations of EGF variants on proliferation of the human normal  
169 fibroblast bj5-t $\alpha$  cell line. Data represent the percent confluence of cells (mean $\pm$  standard  
170 deviation) for each concentration of EGF variants compared to data obtained with WT EGF  
171 and negative controls. Percent confluence was estimated on day 3 (three replicates/treatment).  
172 (B) Different concentrations of EGF mutants D46T and K48T inhibited the growth of A431  
173 cells. Data represent the number of cells calculated on Day 3 (three replicates/treatment). (C)  
174 Comparison of A431 cell growth after treatment with 100 nM WT EGF and EGF variants,  
175 D46T and K48T. Dead cells were labeled with fluorescent annexin V green reagent. Plates  
176 were pre-warmed prior to data acquisition to avoid condensation and expansion of the plate,  
177 which affect autofocus. Images were captured every 2 hrs (4x) for 3 days in the IncuCyte  
178 system.

179

180 Significantly herein we found that one amino acid change on the tail of EGF ligand could  
 181 affect the downstream pathway. To explain this behavior, we proceed analyzing the  
 182 downstream proteins involved in the EGFR network. Both D46T and K48T inhibited  
 183 expression of Phospholipase-C $\gamma$ 1 (PLC $\gamma$ 1), which is a downstream signaling protein required  
 184 for EGFR-induced squamous cell carcinoma (Figure 4A). The low levels of PLC $\gamma$  protein  
 185 lead to a decreased amount of PKC $\zeta$  protein (Figure 4A). A cell-line specific response upon  
 186 interaction between EGFR and ligand (e.g. EGF induce proliferation in normal fibroblasts (8)  
 187 while apoptosis in cancer ones (13)) is consistent with previous literature as well as a  
 188 concentration dependent response (14).

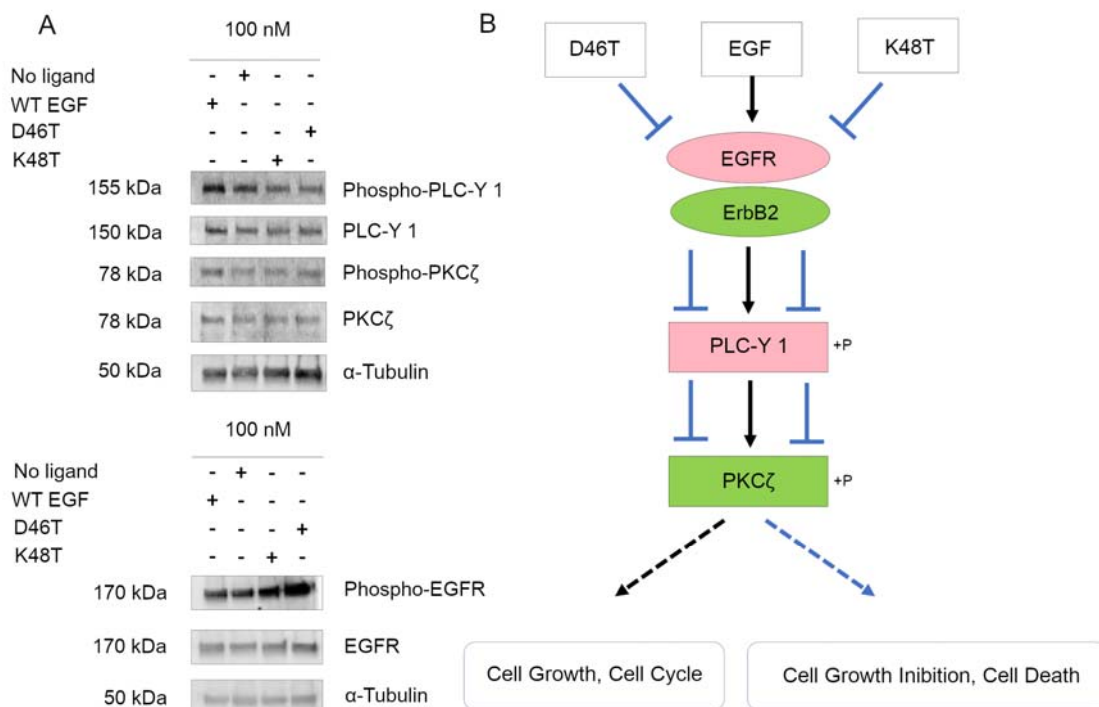

189

190 **Figure 4. EGF variants D46T and K48T affect the EGFR downstream signaling**  
 191 **pathway.**

192 (A) Western blot analysis of EGFR-regulated downstream gene expression of EGF variant-  
 193 treated A431 cancer cells. Expression of Epidermal Growth Factor Receptor (EGFR),  
 194 Phospholipase-C $\gamma$ 1 (PLC $\gamma$ 1) and PKC $\zeta$  protein in A431 cancer cell line after treatment with

195 100 nM WT, EGF variant D46T or variant K48T. Samples were collected on Day 3 after  
196 treatment (two duplicates). Samples were incubated with Goat Anti-Rabbit IgG StarBright  
197 Blue 700 at a 1:2000 dilution and Anti-Tubulin hFAB™ Rhodamine Antibody as a loading  
198 control at a 1:3,000 dilution for 3 hrs and washed with Blocking Buffer and Milli-Q H<sub>2</sub>O (22  
199 μm filtration). Immunoreactive fluorescent labeled samples were visualized and analyzed  
200 with ImageLab Software. (B) A schematic representation of one of the EGF-EGFR-mediated  
201 signaling pathways that may be initiated in the A431 epidermoid cancer cell line. Arrows  
202 indicate the positive action of downstream gene expression, whereas arrows with flat tips  
203 indicate inhibition of gene expression. The “P+” symbol represents phosphorylation of  
204 downstream-regulated proteins. The dashed line represents the potential cellular effect  
205 regulated by altering gene expression levels involved in the depicted pathway.

206

## 207 **Discussion**

208 The prediction of functional residues is a well-developed field (15), where conservation of  
209 each residue in a protein is considered a key factor to rely on. Tools like ConSurf (16) and the  
210 ET-like methods (17) are able to identify slowly evolving positions that are involved in  
211 folding, interaction, or catalytic activity of protein (15). Though, the specific reason why a  
212 residue is conserved remains often unclear. In this work, we show that the conservation score  
213 in the structural alignment of paralog sequences, combined with the orthologs alignment  
214 conservation score is a promising way to identify important residues that affects the  
215 downstream pathway and cellular behavior.

216 Positions conserved in the paralogs alignments are a subset of those conserved in the  
217 orthologs alignment. By subtracting the first, positions with a shared function across all  
218 ligands are filtered out. Then, Cross-conservation analysis overcomes the limitations of  
219 previous methods and highlights ligand-specific functional residues.

220 In particular, the two tryptophan in positions 49 and 50 are strong outliers on our  
221 bioinformatics analysis (Figure 1B). Their score is high even when using conservation  
222 measures that do not take amino acid type change into account (data not shown). We  
223 specifically chose W50 for further testing because of its outward facing position, on the  
224 hypothesis that it might mediate previously unknown interactions. Mutant W50Y did not bind  
225 stronger than WT EGF neither it showed a cellular effect. The distance of W50 from the  
226 receptor might be the reason of this result, from the structure it seems that intramolecular  
227 interaction can be favorite rather than interaction with the receptor.

228 Biochemical characterization of ligand-receptor interaction was done using ITC. Tested  
229 mutants have binding affinities similar to that of WT EGF (Figure 2) except mutant N32R  
230 which showed slightly higher affinity. N32R was the only position chosen which is not on the  
231 C-terminus tail. Its behavior in the binding affinity is different than other mutants and it has  
232 no detected effect at the cellular level, these results confirm the cross-conservation analysis  
233 output which highlight the importance of the C-terminus tail rather than the rest of the ligand.

234 Interestingly, cells treated with mutants D46T and K48T show greater proliferation in the  
235 normal human fibroblast cell line and increased apoptosis in cancer cell lines (Figure 3A and  
236 B). Since these mutations are located in the disordered C-terminus, we cannot infer whether  
237 they disrupt an important contact for EGF high-affinity binding. In fact, we observe the same  
238 binding affinity with the isolated ECD as WT EGF. However, we can assume by our data that  
239 they might induce some conformational change in the receptor which then affect the  
240 downstream pathway. Previous reports have also identified the importance of the C-terminus  
241 for binding specificity (18) and binding affinity (19) as we did. Few studies have examined  
242 the effect of individual positions at the C-terminus of EGF (20), although nobody has  
243 investigated the residues reported herein. We speculate that the mutations might induce a

244 conformational change of the receptor that might affect interactions in the highly modulated  
245 endocytosis (21).

246 Cancer treatment has focused on the EGF receptor and deactivation of the intra-cellular  
247 tyrosine-kinase (22). As the design of EGFR-based drugs remains complex, our study may  
248 support the hypothesis that the D46T and K48T EGF mutants can be used as templates to  
249 design anti-cancer drugs.

250

## 251 **Acknowledgments**

252 We thank Tadashi Yamamoto's Unit for technical help with the cell proliferation assay Keiko  
253 Kono's Unit for the technical help with the WB experiments. We thank Madhuri Gade,  
254 Hayato Yanagida, Mary Collins and Mirco Dindo for critical reading.

255

## 256 **Funding**

257 Financial support by the Okinawa Institute of Science and Technology to P.L. is gratefully  
258 acknowledged.

259

## 260 **References**

- 261 1. Wu JM, Vallenius T, Ovaska K, Westermarck J, Makela TP, Hautaniemi S. Integrated  
262 network analysis platform for protein-protein interactions. *Nat Methods*. 2009;6(1):75-7.
- 263 2. Mann M, Jensen ON. Proteomic analysis of post-translational modifications. *Nat*  
264 *Biotechnol*. 2003;21(3):255-61.
- 265 3. Rao VS, Srinivas K, Sujini GN, Kumar GN. Protein-protein interaction detection:  
266 methods and analysis. *International journal of proteomics*. 2014;2014:147648.
- 267 4. Laisney J, Braasch I, Walter RB, Meierjohann S, Scharl M. Lineage-specific co-  
268 evolution of the Egf receptor/ligand signaling system. *BMC Evol Biol*. 2010;10:16.

- 269 5. Gazdar AF. Activating and resistance mutations of EGFR in non-small-cell lung  
270 cancer: role in clinical response to EGFR tyrosine kinase inhibitors. *Oncogene*. 2009;28:S24-  
271 S31.
- 272 6. Cantor AJ, Shah NH, Kuriyan J. Deep mutational analysis reveals functional trade-  
273 offs in the sequences of EGFR autophosphorylation sites. *Proc Natl Acad Sci U S A*.  
274 2018;115(31):E7303-E12.
- 275 7. Nicholson RI, Gee JM, Harper ME. EGFR and cancer prognosis. *European journal of*  
276 *cancer (Oxford, England : 1990)*. 2001;37 Suppl 4:S9-15.
- 277 8. Carpenter G, Cohen S. Epidermal growth factor. *Annual review of biochemistry*.  
278 1979;48:193-216.
- 279 9. Hardwicke J, Schmaljohann D, Boyce D, Thomas D. Epidermal growth factor therapy  
280 and wound healing--past, present and future perspectives. *The surgeon : journal of the Royal*  
281 *Colleges of Surgeons of Edinburgh and Ireland*. 2008;6(3):172-7.
- 282 10. Misale S, Yaeger R, Hobor S, Scala E, Janakiraman M, Liska D, et al. Emergence of  
283 KRAS mutations and acquired resistance to anti-EGFR therapy in colorectal cancer. *Nature*.  
284 2012;486(7404):532-6.
- 285 11. Groenen LC, Nice EC, Burgess AW. STRUCTURE-FUNCTION-RELATIONSHIPS  
286 FOR THE EGF/TGF-ALPHA FAMILY OF MITOGENS. *Growth Factors*. 1994;11(4):235-  
287 57.
- 288 12. Souriau C, Gracy J, Chiche L, Weill M. Direct selection of EGF mutants displayed on  
289 filamentous phage using cells overexpressing EGF receptor. *Biol Chem*. 1999;380(4):451-8.
- 290 13. Gill GN, Lazar CS. Increased phosphotyrosine content and inhibition of proliferation  
291 in EGF-treated A431 cells. *Nature*. 1981;293(5830):305-7.

- 292 14. Bjorkelund H, Gedda L, Andersson K. Comparing the epidermal growth factor  
293 interaction with four different cell lines: intriguing effects imply strong dependency of  
294 cellular context. *PloS one*. 2011;6(1):e16536.
- 295 15. Nemoto W, Saito A, Oikawa H. Recent advances in functional region prediction by  
296 using structural and evolutionary information - Remaining problems and future extensions.  
297 *Computational and structural biotechnology journal*. 2013;8:e201308007.
- 298 16. Ashkenazy H, Abadi S, Martz E, Chay O, Mayrose I, Pupko T, et al. ConSurf 2016:  
299 an improved methodology to estimate and visualize evolutionary conservation in  
300 macromolecules. *Nucleic Acids Res*. 2016;44(W1):W344-W50.
- 301 17. Lichtarge O, Bourne HR, Cohen FE. An evolutionary trace method defines binding  
302 surfaces common to protein families. *J Mol Biol*. 1996;257(2):342-58.
- 303 18. Sato K, Nakamura T, Mizuguchi M, Miura K, Tada M, Aizawa T, et al. Solution  
304 structure of epiregulin and the effect of its C-terminal domain for receptor binding affinity.  
305 *FEBS letters*. 2003;553(3):232-8.
- 306 19. Wingens M, Walma T, van Ingen H, Stortelers C, van Leeuwen JE, van Zoelen EJ, et  
307 al. Structural analysis of an epidermal growth factor/transforming growth factor-alpha  
308 chimera with unique ErbB binding specificity. *The Journal of biological chemistry*.  
309 2003;278(40):39114-23.
- 310 20. Matsunami RK, Yette ML, Stevens A, Niyogi SK. MUTATIONAL ANALYSIS OF  
311 LEUCINE-47 IN HUMAN EPIDERMAL GROWTH-FACTOR. *J Cell Biochem*.  
312 1991;46(3):242-9.
- 313 21. Bakker J, Spits M, Neefjes J, Berlin I. The EGFR odyssey – from activation to  
314 destruction in space and time. *Journal of Cell Science*. 2017;130(24):4087-96.

- 315 22. Sotelo MJ, García-Paredes B, Aguado C, Sastre J, Díaz-Rubio E. Role of cetuximab  
316 in first-line treatment of metastatic colorectal cancer. *World journal of gastroenterology*.  
317 2014;20(15):4208-19.
- 318 23. Zerbino DR, Achuthan P, Akanni W, Amode MR, Barrell D, Bhai J, et al. Ensembl  
319 2018. *Nucleic Acids Res*. 2018;46(D1):D754-D61.
- 320 24. Katoh K, Standley DM. MAFFT Multiple Sequence Alignment Software Version 7:  
321 Improvements in Performance and Usability. *Mol Biol Evol*. 2013;30(4):772-80.
- 322 25. Goddard TD, Huang CC, Meng EC, Pettersen EF, Couch GS, Morris JH, et al. UCSF  
323 ChimeraX: Meeting modern challenges in visualization and analysis. *Protein Sci*.  
324 2018;27(1):14-25.
- 325 26. Okonechnikov K, Golosova O, Fursov M, Team U. Unipro UGENE: a unified  
326 bioinformatics toolkit. *Bioinformatics*. 2012;28(8):1166-7.
- 327 27. Nguyen LT, Schmidt HA, von Haeseler A, Minh BQ. IQ-TREE: A Fast and Effective  
328 Stochastic Algorithm for Estimating Maximum-Likelihood Phylogenies. *Mol Biol Evol*.  
329 2015;32(1):268-74.
- 330 28. Kalyaanamoorthy S, Minh BQ, Wong TKF, von Haeseler A, Jermin LS.  
331 ModelFinder: fast model selection for accurate phylogenetic estimates. *Nat Methods*.  
332 2017;14(6):587-+.
- 333 29. Wiedemann C, Bellstedt P, Grolach M. CAPITO--a web server-based analysis and  
334 plotting tool for circular dichroism data. *Bioinformatics*. 2013;29(14):1750-7.
- 335
- 336



337 **Materials and Methods**

338

339 **Sequence and structure analysis**

340 Sequences of all ligands and the multiple sequence alignment of EGF orthologs were  
341 obtained using Ensembl (23). Multiple sequence alignment of all ligands was performed  
342 using MAFFT software with a built-in scan of optimal parameters (24). Structure images and  
343 alignments were created using Chimera (25).

344

345 **Phylogenetic analysis**

346 From the multiple sequence alignment of the ligand EGF from different species, very similar  
347 sequences were removed (mostly from monkeys). The fruit fly EGF sequence was added as  
348 an outgroup in the EGF phylogeny tree, while *Caenorhabditis elegans* EGF was used as  
349 outgroup in the tree of all ligands. The image of MSA and phylogenetic trees were handled  
350 using unipro UGENE software (26). Three phylogenetic trees were made using Neighbor  
351 Joining (NJ), Maximum Likelihood (ML), and MrBayes (MrB) methods.

352 As additional method, trees were also made with IQTREE (27), using ModelFinder to scan  
353 for the most fit evolutionary model and parameters (28).

354

355 **Calculation of Cross conservation score**

356 From the evolutionary MSA and ligands MSA (or MSTA), two conservation measures were  
357 obtained. The conservation score was calculated in three ways: 1) identity score, 2)  
358 BLOSUM62 matrix score, and 3) JSDw score. Identity score measures the frequency of  
359 appearance of EGF residue in other ligands. In BLOSUM62, reference position substitutions  
360 are weighted using the BLOSUM62 matrix. JSDw is the method used in ConSurf paper (16),  
361 and is based on Jensen Shannon divergence, with a window of residues. The cross-

362 conservation plot and analysis were performed with the Python package SEABORN. The two  
363 conservation scores were plotted, and a cross-conservation score was obtained by computing  
364 the distance from the diagonal of the plot.

365 The code used in the analysis of the cross-conservation score and plots, and the data used in  
366 this paper are shared on Github: <https://github.com/oist/CrossConservation>.

367 Cross-conservation analysis is based on the following assumptions: 1) Orthologs  
368 evolutionary alignment conservation shows whether a residue is important for either  
369 structural or functional reasons. 2) Ligands alignment conservation scores denote the  
370 importance of a residue for receptor binding (the main shared property of all ligands). In our  
371 analysis we rely on these two assumptions to conclude that highly conserved residues in the  
372 evolutionary alignment (Figure C in S1 Figure) that are not conserved in the ligand alignment  
373 (Figure A in S1 Figure) have ligand-specific relevance related to their function.

374 The decision of which mutation to introduce was made using the ligand alignment.

375 Overlapping residues at a given position were divided into two groups based on EGF-like and  
376 non EGF-like activation of the receptor. This separation was shown to follow binding affinity.

377 Residues that introduced a noticeable shift in amino acid properties in the two groups were  
378 selected.

379

### 380 **Synthetic Peptides**

381 Wild-type EGF (protein sequence:

382 N'NSDSECP LSHDGYCLHDGVC MYIEALDKYACNCVVG YIGERCQYRDLKWWELR-

383 C')

384 and EGF variants (See below the list of peptides) with purity >90% and quantity 5 mg/mL

385 were ordered from Scrum Net Co. These peptides were used for ITC measurements, Circular

386 Dichroism (CD) measurements, proliferation studies, and Western Blot (WB) analyses.

387

388 **The list of Mutations:**

| Name                     | Mut1 | Mut2 | Mut3 | Mut4 |
|--------------------------|------|------|------|------|
| Position                 | 46   | 48   | 50   | 32   |
| Amino acid substitutions | D46T | K48T | W50Y | N32R |

389

390 **Cell Lines**

391 The *Bj5-ta human normal fibroblast cell line* was purchased from ATCC. Cells were grown  
392 in DMEM with 10% fetal bovine serum (FBS), and 5 µg/mL hydromycin B.

393 The *Swiss Albino 3T3 mouse normal fibroblast cell line* was obtained from the RIKEN Cell  
394 Bank. Cells were grown in DMEM, 10% FBS, 50 µg/mL gentamycin at 37°C in a 5% CO<sub>2</sub>  
395 atmosphere with 95% humidity.

396 The *A431 human epithelial carcinoma adherent cell line* (RIKEN Cell Bank) is a model skin  
397 cancer cell line with overexpressed EGFR used for oncogenic pathway studies (G. Carpenter  
398 et.al.,1983). Cells were cultured in DMEM supplemented with 10% FBS (Sigma-Aldrich), 50  
399 µg/mL gentamycin antibiotic.

400 Experiments were conducted at 37°C in a 5% CO<sub>2</sub>-enriched air atmosphere with 95%

401 humidity. Cell lines were grown and used for cell ELISA and cell proliferation studies.

402

403 **Cell Proliferation Assay**

404 We measured cell proliferation using a label-free, non-invasive, cellular confluence assay  
405 with IncuCyte Live-Cell Imaging Systems (Essen Bioscience). Human *Bj5-ta* (2,500 cells /  
406 well) and Mouse Swiss Albino 3T3 (1,000 cells/well) were seeded overnight on a 96-well  
407 plate (Corning) at 37°C in an incubator. The next day, cells were treated with WT EGF and  
408 mutants at 1 nM, 10 nM and 100 nM concentrations and placed in an XL-3 incubation

409 chamber maintained at 37°C. The plate was scanned using a 4x objective at 2-hr intervals  
410 over 3 days. Cell confluence was measured using IncuCyte Analysis Software. The IncuCyte  
411 Analyzer gives real-time confluence data based on segmentation of high-definition phase-  
412 contrast images. Cell proliferation is shown as an increase in percent confluence.

413

#### 414 **Apoptosis Assay**

415 Experiments were performed with the A431 human cancer cell line. 5,000 cells/well were  
416 seeded on a 96-well plate (Corning) and incubated at 37°C for 24 hr. Media were replaced  
417 with fresh DMEM containing WT EGF, or EGF mutants at 1, 10, and 100 nM concentrations  
418 and fluorescent annexin V green reagent. Plates were pre-warmed prior to data acquisition to  
419 avoid condensation and expansion of the plate, which affect autofocus. Images were captured  
420 every 2 hrs (4x) for 3 days in the IncuCyte system.

421

#### 422 **Statistics**

423 Proliferation and apoptosis experiments were replicated three times. All results are shown as  
424 the mean±s.d. Raw data was analyzed by multiple t-tests. Prism 8 software was used for  
425 statistical analysis.

426

#### 427 **Isothermal Titration Calorimetry (ITC)**

428 All ITC studies employed a MicroCal PEAQ-ITC System (Malvern). For titration, both  
429 EGFR ECD (Sigma-Aldrich) and EGF variants were dialyzed into the same reaction buffer  
430 Milli-Q H<sub>2</sub>O (22 µm) at 25°C. Each titration involved serial injections of 13 × 3 µL aliquots  
431 of EGF variants (200 µM) into a solution of EGFR ECD (20 µM) in the sample cell. In each  
432 case, the reference cell was filled with the same reaction buffer as the control to determine  
433 the heat upon binding of the two components. The measured heat constant value was

434 subtracted from the heat per injection prior to analysis of the data. The experiment was  
435 replicated twice. Results were analyzed by MicroCal PEAQ-ITC Analysis Software.

436

#### 437 **Circular Dichroism (CD)**

438 Far UV measurements were taken at a protein concentration of 0.1  $\mu$ M, using a cuvette with a  
439 path length of 0.1 cm. Secondary structure content was calculated from far UV spectra using  
440 CAPITO software (29). Five scans in the 190-240-nm wavelength range were taken.

#### 441 **Western Blot Analysis**

442 A431 epidermoid carcinoma cells were harvested using Lysis Buffer (0.4% SDS, 0.2%  
443 BETA-ME, 1% Bromophenol Blue, 10% glycerol. Samples were incubated at 65°C for 10  
444 min, sonicated, and centrifuged at 15,000 rpm at 22°C for 10 min. Supernatants were used for  
445 further analysis. Sample concentrations were measured with a Pierce<sup>TM</sup> BCA protein assay  
446 kit (ThermoFisher Scientific). Proteins were mixed with 2x Sample Loading Laemmli Buffer  
447 and incubated at 65°C for 10 min. Equal amounts of protein were loaded in 4-15% Mini-  
448 PROTEAN® TGX<sup>TM</sup> SDS-PAGE gel (Bio-Rad) and transferred to PDFV membranes (gift  
449 from Cell Membranology Unit, OIST). Membranes were blocked for 10 min with Turbo  
450 Transfer Buffer and probed with monoclonal rabbit anti-EGFR antibody (Santa Cruz  
451 Biotechnology, INC), monoclonal rabbit anti-PLCy, and anti-phosphorylated PLCy  
452 antibodies (Santa Cruz Biotechnology, INC), monoclonal mouse anti-scr and rabbit anti-  
453 phosphorylated src antibodies (Santa Cruz Biotechnology, INC), at dilution 1:1000. Samples  
454 were incubated with Goat Anti-Rabbit IgG StarBright Blue 700 at a 1:2000 dilution and Anti-  
455 Tubulin hFAB<sup>TM</sup> Rhodamine Antibody as a loading control at a 1:3,000 dilution for 3 hours  
456 and washed with Blocking Buffer and Milli-Q H<sub>2</sub>O (22- $\mu$ m filtration). Immunoreactive  
457 fluorescently labeled samples were visualized and analyzed with ImageLab Software.
